# Supplementary material for: Evaluation of the moisture sources in two extreme landfalling atmospheric river events using an Eulerian WRF tracers tool
Source: Copernicus journal article supplement (doi:10.5194/esd-8-1247-2017), 2017-12-22
Supplement: Supplementary file 1 [file esd-8-1247-2017-supplement.zip]

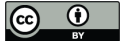

## *Supplement of*

# **Evaluation of the moisture sources in two extreme landfalling atmospheric river events using an Eulerian WRF tracers tool**

**Jorge Eiras-Barca et al.**

*Correspondence to:* Jorge Eiras-Barca ([jorge.eiras@usc.es](mailto:jorge.eiras@usc.es), [jorge.eiras.b@gmail.com](mailto:jorge.eiras.b@gmail.com))

- [esd-8-1247-2017-supplement-title-page.pdf](#)
- [Final\\_Video.mp4](#)

The copyright of individual parts of the supplement might differ from the CC BY 4.0 License.
